# Supplementary material
Source: publisher figshare collection journal article supplement (https://karger.figshare.com/articles/dataset/_/5123476)
Supplement: Supplementary file 1 [file 1]

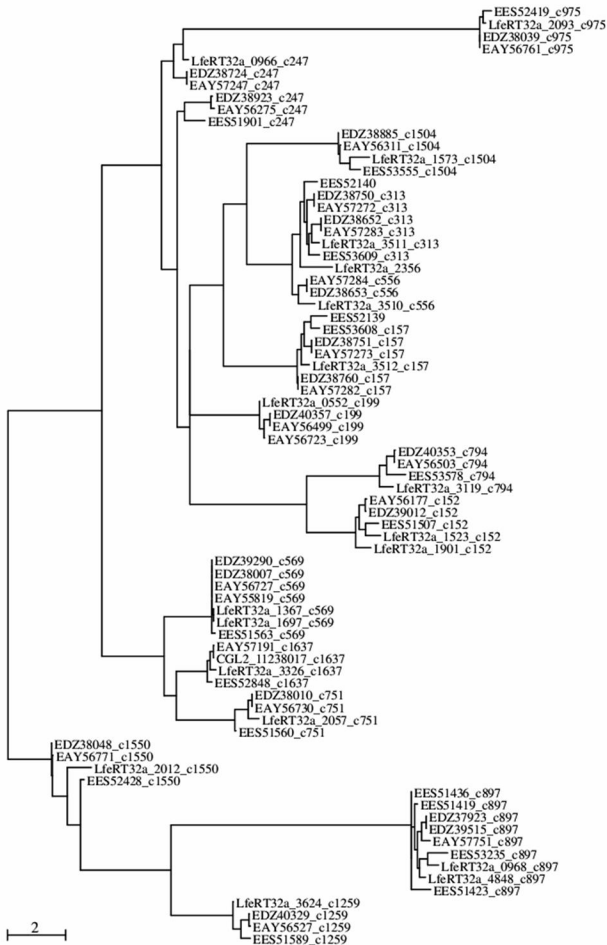

# DNA and amino acid sequence of genes and proteins of *petI* and *petII* operons of *Leptospirillum rubarum*.

## 1. DNA sequence of putative Pet I operon of *L. rubarum*

gggtcccggaaggcagcgtgaatctcctccctccaccatccgggacaggagggctctccggttctctgtgaaagctgctgagtcctccgaga  
acttccggcacagaaaaaagggaaaaaacccgcttccctcaaacgtccggaactgacgtccgaggaagctcttatcagaacagggaggga  
atgATGCATCTACTGGAAGGAAAAAGGTTTCTTGTGACGGGAGTGGCAAACCGATGGTCCATCGCCTGGTTCAGTGGCAACGGCCATTATTTCG  
CGAAGGAGGTCTGGTGACCTTTACTTACCAGGGGAAACCCAGCTCGCCAACTCGAGAAAAATGCTGGGGAACTTCCGTCAAGGAACTC  
CCCTTCTGGTTCCTCTGGATGTTCAAAGTGACTCTTCTGTGCAAGAGGGCGGTACGGCGGGCGGAATCGGGAGGAAGACGCTACGATGGACTG  
GTGCACAGCATTTGCTTTTGC AAAAAGGGAAGAGCTTGACGGAGCCTTTCTGGATACAAGCCGCGACGGATTTCTTGGCCCGAGGAAGTGAG  
TGCCATTACTTGTCTGCTTTGCCGCGCCTTTTCCAGGCTTCTGAACGATGGTTCGTCGATCGTGGCCATGACCTATCTGGGTTCGGA  
GGGTGTGCCCCACTATAATGTGATGGGGCTGCAAAAGCGGCCTGGAAGCTTCGGTGCCTATCTTGCCTTCGAGCTCGGCCAGCGTTCC  
ATTCGTGTCAATGCATTGTCCGCGCGCCCGGTCAAAACAGCATCCGGCAGGGCAATCAAGGGGTTTACCAGATATGCAAGAACGGGTTCCGG  
GCAGGCCTCTCAAAAAATCGCTGACAACAGAGGATGTGGGGGATGTTACGGTTTGCTGCTCTCAGACCTGTTTTCGCGAGTTACGGGAG  
AGCTGATCCATGTGACATGGGGTACCATGCATTGGGGATGGTCTCCCTCGAGCAGGGTTAGggggaaacgtccgaaggaggagaaagaga  
gcggacaatttagaaaaaggggattcATGCGGCAGGAAGTCACTTTTCTGATGGGCATTCCAGTCCAGAATGCCTCGGGGCAAGTCATCGG  
TACTCTGGAAAGCTCGTTTCTGAGACCGGAAAAAAATTACGGAGATTGTCGTCGGGATCTTTCGGGCTCAAGCGGCTTCTCTCA  
GTAGGGTTTCGGGAAATATCCGAACAGTTTCTGGTGTCTCAATCAGCCCGGTCTTCTGAGGACTTGCCGCTTTCGATATTTCCAGTTTCGAG  
GAGGTCCCCACATGGTCTATCCGCGGGGATACCGGCTCGAAGTGGGATCGCTATTGACCTCAACCGTGCAGCAACGATTTCTCGGGGA  
GGAGGAAGCCCTGTCCCGGAGGGATTTTATGGCAAGGAGCAGCTTCTCGTTGCCATCTGATCGGGATCAGCCTGGTCTGCTCCTATTGGCG  
GTTATGTGCTGGCGCGCGGCAAAACAAAGCTGTCCGATCATTGGACACGCTCAGGTTTCGATGATCAGTTGGCGATGGACGAACCCGTC  
TCACACAGCTTCAATGCGATGTCTGTGAGCGGATGGATGCGTGTGCCGCTGATCCGGACGGTGTGGCTCATCCGCCATTCCGGCAGCGCGGA  
TCCCATGTCTCGTTTCAAGAGATCTGGTTTGGGCTTGATTCTCCATTGGAGAAAAAGGATTCTTCACTCTCTGACGGTTCTCTCCCCA  
TCTGCCCTCATTTGGGCTGCTCTCTCAATGGTTTTCGATAAAAAACTGTTTATCTGTCCCTGCCATCACTCGATTATGAATTGAATGGC  
AAACGTATCGGGGGCCCGCGCCTCGTCCGATGGACAGTTGCCGTCGGGATTAAAAAAGCGGAGAGATCTCCATCTCTATGAAGAGTT  
TCAGGTCGGAACCCCTCAAAAAATCCGTTTGTCTGATCGCAATCCGGAGGCCGTCATGAAAAAATCCCATTCGACAGTCGGATCATGC  
AATATCTCGATGAGCGCATTCGTTTGGGTCAGTCTCCGTTTCTTCTCGAAGAGCCATGCCTGGAGGGGCGCGTGGGCTTATGTGTTT  
GGGAGTATGGTTCTCTTTACGCTCATCTGCAATTTGTACCGCGCTCATGCTGGCTTTTATATGGTGGCACTCCCGATCATGCTGGGA  
CAGCGTCAACTATATTGATCACCTTCACTACGGAACCCCTGGATGTGGGACGACTGATCCGGGGTTTCACTTGGGGTGCTTCGATCATGG  
TTGTGCTGGTGGGGCGCATCTTCTCCAGGTGTTTATGAGGAGCCTACAAAAGGCCAGGGAAATCATGTTGGCTGGTTGGCGTCATCCTC  
CTGGCCCTGACCATGACGCGCGCTTTTACCAGGTATCTTCTCCCTGGGACGAGCGGCCTATTGGGAACGATCGTCGGAACAAACATGAT  
TGGTCTCGTCCCGGTCTGGGACCACTTCTGAAAAGTGCCATCCGTTGGAGGAAGTGGTCTGGGAGCCTTGACACTCTCCCATTTCTTGGCA  
TTCACACCATGATGCTTCCATCGTTTATCCTGTCTGTCGTTTCTTCTGACGTTGTCGGACCGCGGGGCTTCCCG  
GGGTCTCTCCACTCTGGAAGCGCAAAAAGAGTATTTTACCCAGACAGGTCGCTGATGGATGCTCTCGCCATGCTGGCCGATTTGTCTT  
GATCGCGAGTCTGTCTGTTCTTCTCCCGCCGGTCTGGAAGCGATGGCCAAATCCGGCCAATCTTCTACAGTCCGACTCCGGCGTGGTATT  
TTGATCGGATCTTCGAGCTTCTGAAAATGATTCGTCGGGAGATTCTGGGTGTTATTGGAGTCCGGCAATCATCGCCCTGGTTCTCTTGATG  
CTGCTTTTGTGGATCAACGACCGGAGCGCTCTCCTTTTCACTGCTCGGTCGCGCTTGTCCATGCTTTTGGTTCTGGGGAGTATGCTGGG  
ATTGTGATCGCCCGGAAGCAGGCTTCAAAAAGCTCGTCCCTTGTATCCGGCAGCAGTGAAGAGGGGAAAACTTGTGTTTCGAGCACTTCGG  
GATGATGGGGTGCCATACGATGATGGGAAAGGGGGACATATCGGCCCGACCTTTTCAAGAAAGGGCTTGTGTTGTCATTTCGAGCACTGG  
CTGATCGTTAGTTTGTAACTCTTCGGCCCACTTTCGGGTTCTTCAATGCCGCCCTTTACCTTTCTGACACCTGAACAGAGACATGATCT  
GGCCCATGATCTCTCTCTTTTGGGCGGACCGGATGGCCGATACGACGCGCTAGGTCCTTTTCTGAAAAAGGGGACGGTCTTTTACTTAA  
GCGTTTTTCAGGAGGTGAATGGCCCGGATTTTTCAGGCTTGCCGACAAAATACACCCTTCCGTTGACAAGGGTGGTCCGAACCGACTGAATG  
GAGTGACGTTGAGCCAGTTCTTTTCCCGTTTCGAATCGATGTTGATTTCCTCATACTGAAAGGGAATATCG

*sdrA*

*petA*

*petBC*

### 1. *sdrA* product: Enoyl-(Acyl-carrier-protein) reductase (EAY57193.1)

MHLEGRFLVTGVANRWSIAWSVATAIIREGGLVFTFYQGETQLANLEKMLGELPSKETPLLVPLDVQSDSSVEEAVRRAESGGRRYDGLV  
HSIAFAKREELDGAFLDTSRDGFLLAQEVSAISLVLLCRAFSRLNDGSSIVAMTYLGSERVPHYNVMGAAKAALASVRYLAFLDLGQRSI  
RVNALSAGPVKTASGRAIKGFTDMQKAVSGQAPLKKSLTTEDVDVTVCLLSLDFRAVTGELIHVDMGYHALGMVLPLEQG

### 2. *petA* product: Probable Rieske iron-sulfur family protein (EAY57192.1)

MRQEVTFRMGIPVQNASGQVIGTLEKLVFLETEKKITEIVVRDLSGLKRVPLSWVREISEHVLVNLNHPGHLEDLPVFDISQFEEVPTWFYPP  
GYRLELGSLLTLKPCDERFLGEEALSRRDFMARSTVLVATLIGISLVPIGGYVLAALKLSDHWTTLTVRIDQLPMDEPVSHTFNAMS  
SGWMRVPPVRTVWLIHSGAADPMSRSEDVLVLGLDSPLEKKDSSPLLTVLSPICPHLGCSPQWFSKDLKLCICPHHSIYELNGKRIGGPAPR  
PMDQLPVRIKKSSEISILYEEFQVGPQKIRLS

### 3. *petBC* product: Putative cytochrome b/b6 (EAY57191.1)

MKSHSDSRIMQYLDERIRLSRLRFLLEPMPGGARWAYVFGSMVLFLLILQFVTGVMLAFYGGTPDHAWSVNYIDHLHYGTLDVGRLI  
RGFHYWGASIMVVLVGAHLLQVFLWGAYKRPREIMWLVGVILLALMTAAFTGYLLPWDERAYWGTIVGTNMIGLVPVVGPLLSAIRGGSG  
LGATLTLSHFFAIHTMMLPSLFLFVVFHLVIFRRVGPAGFPFRGSSSTLEAQKEYFYPRQVLM DALAMLA VFLIASLSVLFPPGLEAMANPA  
NSSYSPTPAWYFDWIFELLMIRPEILGVLGPAI IALVLLMLPFVDQRPERSPFHRPVAVLSMLLVLSGMLGLSIAAEAGFKKLVLDPAA  
VVRKGLVFEHSGCMGCHTVMGKGGHIGPDLSEGLVGHSEHLLIVQFVNSSAHFPGSPMPPTFLLTPEQRHDLAQVYVSSLGRTGWDPDTR

## 2. DNA sequence of putative Pet II operon of *L. rubarum*

GGAGG GTAGCAGAA TGAAGGGGAAATATAAGCTTCACATACCAGAATATCAATATTACGCCGATCAGGTTGCCTGCCGGAAAGGCTGTCCC  
GTTGGAACAGATGCGGGCGGATATGTTACAGGCAATCCGAAGCGGTCTCTACGAAAAGGCCTATGCCATTGCCGGGGGGCCAAATCCGTTTGC pnrA  
TTCTGTTTGCGGATGGGTCTGTAATGCGCCTGTGAAGCATCCTGTACACGCGGCAATATTGATTCTCCCGTCACGATTGCGCGCTCTCAAAA  
GATTCGTTACCGAAAAATTTGGTGTGAAGCCGTCATGGATCCTGCATCAACCCCTCAGGTACTCGACTGCGCCAGGAGTTCCTACGGGCGC  
GCGACAGGGGAAAAGTCCGCGATTATCGGTGGCGGTCCCTGCAGGGTTAACGGCTGCCATGATCTTGCTCGTCTCGGGTATCGTATTACCAT  
GTTGAGGGCCAAACAGCGTCTTGAGAGCCTGTTTTATCTTGTTCCGGAATACCGTTTGCCTCGCCCGCTGATCCAGGCTGAGGTAGATGCCA  
TTGCAAGTATGGGATTGATATTCTGCTCTGGGGACGAAAGTCGGGAAAGACGTTTCGTTCAAGGAAATTCAGGAGGAGTTCAAGTCTGTTGTC  
GTTGCCGTGGGCGCATGGGGCAGTCGACCGGTTCCCTTTCGAAGGAAAGGAGCTTGAGCATGTCTATTCCGCCCTTCCGTTCTTTCAGTCTGT  
TTATCTTGATCATTTCTCTGTTCGGTCCGCTCGCGTGTGGCTGTGTGTCGAGCCGGAAATGTCGCGATGGATGTTTGC CGAACAGCCGTTT  
GGCTTCCAGGGGTTGAAAAAGTGAGCGTTATTGCCCTGGAGGACTGGAATGAAATGCCGGCTGATGACATGGAATTCAGGATGCGGTGCGC  
GAGGGGGTAGAGTTTCTGGTCAGAAAAGGGACCAGAAGGTTGGTTGGCGAAGGAAAGGTGCAGGGGTTGGAGGTCGTAGGGTTCTTTCCGT  
ATTCGATGATCAGGACGCTTTTCTCCGACTTATGATGAAACGGAAGAGTGTCGTTCTTTTGACTCCGTTGTGTTTGCATCCGTTCAAA  
CGATCGACTCTTCTTTCATCTTCGGAGCATGATTCGGTGATTGGCAGAAACGGGGTGATTCCGGCCCAATATCCACTCGATGGAAACAGGG  
ATCCCCGGAGTGTTCGCCGACGTTGATGTTGTGACGGGGCCAAAGATCTTTATGATGCGATCGCAGGAGGGCAGAAAGGCAGCAGCATCTGT  
GCATCGTATCTGACAGGAAATCGGAAGAGGTAAGGTTCTACCGGTGTCTACTCCTGTGATCATCGGGGAAACCCGACTCCGATCTGGC  
CGGTTGATTTTAACTGCGGATGGATATTATGGGATTTCAGGGCCAATCCATCACTTTTGACACCGGAATTCGAAAAACGAATTTTGAACATT  
GCAGAGCTGTCTTTAGCGAAGAAGAAGCAAGGGAGCAAGCGTCCCGTTGCCTGACCTGTGATGCAACCAATCTTTGAGGGTGAAAAAGTG  
CATTATGTGCGGGGATGCGTAGACGTTTCCCGGAATATGCCCTTGAAGATGATTCCTTGTCCGATGTGGATCTGGACACGGAATCCACGG  
CCAAGGTTGTGAAAGCTTCTTGGGGTAGAAGTGTGAAAAGGGAAGAAGTTGGTGTGATCAGAAATCTTGATCATTGACGGCGATGATT  
TGGGAAGGTCGCGGTTCCGCTGTGGGCTTTGTGCGCAAGGCGAACCCTGCAATCTCGATGGAGTTTGTGAAATCAAGCAG GG  
AGGTCGCCCTTGCCATGAGTACAGCTATGAGCGGAACGGGAAATCAGGATTCCCTGAAAGATGCGGCCAGCCCATCTGATTTGGGTGCAAGA  
AAATTTATGCTGGCTGCCGTTGGGGTGTGTGTCGGCGTTACCCTGGCAGGTTGACCTATGCAGCATACAAATTTATGTTTCTCCGATCCT  
GTATGAGCCGCCAACCGTATTCAGAGATTGGCCATGTTACAGAATATGGTCTGGGCGTTGATGAGAGATGGAATTTGAAAGGGCGTTTGTGG  
TCGTCGGGAACATGCGCGGAATCTATAACATGATTCTGATCTGTCGCACTTTGGGATGTACCCCAACTGGTTTCCGGATCAAAAAAGATT  
CGTTGCCCATGTACGGGTGATTTACGACGTACACGGGAATGTTGCTGGCGGTCCGGCTCCGAGAACACTTGGAGAGGCCAGATCACAAA  
GGATCCTGTGACGGAGCTCTCGTTGTCAACACGCTGTCCGGTGGACCCGAATCCGGCGCAGACACCGCAGGGTTTGTGGGTCAAGGAAA  
AAGTGAAGGAAGTGAACCCCTCTGGATTGAGCATTCCCCCGGCCAGGGGCTTCTGTTGCTCCAATCGACTGCTTTGTCTAAATGCAAGCC  
CGAAGATGGAGGAAGATCTTCCGGCTTTTGTGACCGAAAGCGGAAGCTGCCGGAACAGGAATCCTATAAACTATACCTTTTAGATCAA  
TAGCCCTCAGGGCCGATGGGCTTGTCTATAGCAAGCCGAAAGACAATGATTCTCAAAATTC AAAGGACCACGAATGCTTGAGAGCTTGAA  
GGAGAAATGACCAAGTCGCAAGTCTTTCGATCAATTTTAGGCACGGTTTCCGGATAATGACATGAACCGGGCCTATGTAGTTTTCAGTA  
ACGTATTTCTGCATGTCCATCCGTCACAGGTGCGTCGGAGTGCGTTGCGGATGCGTTACACGTTCTGCCTTGGTGAATCACGCTCTTCTGT  
TTATCATGCTGGCAGTGACCGGAATCTGGCTCATGTTCTATTACACTCCCTATACAGGTCTGGCCTACAATAATCCAGGATCTGCAGTT  
CGTGATCTTCCGTGGAACCTCATGCGGGATCTTACCGATTGCGCGCATGGAATGGTCTTTTTGTGTGGTTGCATATGACGAGAGTTT  
TTCTTACCGGCGCTTACAAGGCTCCCGCGAGTTCAACTGGGTGGTCCGGGTCCTGCTGCTGGTGATGACTCTATTCTAAGCTGGACGGGC  
TATCTTCTTCCCTGGGACCAGCTGGCCTATTGGGCTGTGACCGTCGGAACAAAAATGGCCTCCTACACTCCCTTTATCGGACAGAATGGTCC  
CTGGGGGCGCAATTTGGGCTTCTTCCAAACAAACGACATTATGTTTATGCTTATCGGTGATGCTGCTCGGTCAAATGCGCTCATCCGCT  
TTTATGTTCTTCAATTGCGTCTTCTCCGCTTTTTGTGACGATCGCATTGGCCGTCCTACTTCTGGCGCATTCGTAAGGATGGATTCTCCGGC  
CCATTGTAAGAGCAGTTTTCAGGGTCAATCTTTAACACTCGGGATCCGAGAGGGGATATCTAATGGAGAACAAGGTGACAAGAGAAATTTT  
CCTCGTGATGCGAGGAAAAGTTACGGTTTGGTCAATGATGAAAGGATCGACTCCTATTGTTAAAAAGGAGCCGGAAGTACTGTCTATAC  
ATGGGCGGCAACCTCATGATGCTGAACCTCATCTGCGCATTTATGTAACGCGCCGGCTGATCATTCTGGTTCAAGTTTGTCTGTTGAAATG  
GATCTCTGGCGGACCTTCGACAACGCCAAACCCATGCGCGCTCCCTGGTACTTCTGGGATTGCAGGAGCTTCTGGTTTATTTTATGATCCA  
TGGTATGACGGCGTGTCTTCCAGGAATGATTATGTTGGATTAAATGACATTCCTTATGTCGATACAAACCCGAAAGGTGTCGGTTACTA  
CACTTTTCCGAGAGAAATTTGCTATCTTCAATTACTCTTCCGGTTTGTCTCTGTTGGGTGACCATTTGCTGCGGAACCTATCTGAGAG  
GTCTGGACTGGCAATGGTACTGGCCATGGAGTGATCATCTGGTGACATGAATCCGGCACTGGTGACGCTTGTCTCTGATATTTGTTTTT  
GTCAATTTGTTGATGTCTCGAAAGATGTTGGAAGAGCATTATGTGACGTTCTCTTTTGTGCTACTTGTGCTGATAGGAATGGCCATTCTCTTA  
TTCTTTATGCGGAAATCTACGATTGCTTGGTGGAGCCCGTACTTTGTTTTATGCTCTTTTCTCTCAATGATGGGTGTTGCAATTA  
AGATTGTTCTGAGACTTCTCTTCAACATTAATATATTGTCGTTACACGCTGGATTAATGTTTGAAGTTTATTTGGCCCTGTTTCTTGAAATG  
AAACAAAAAGAAAGACAGTTCTTTTCAGAAAAGCGTTACTCACTTTCAAGGCTCTATTGTAAGGAGAGTTTATGAGTTTCATTTCACAATCTC  
TTGAATGAACCTGGTTCGAACAAATTTTCGGATTCCCTTACCGGATCGGAATTCCTTGACCTCGTGGTTGGAACAGCGTTTTTTTATTA  
TCTCTTGATCTGGTTCCAGAAATGGCAGGAACGCTCCTTTTACCAGAGGGGATCCGCTTCGCAAGGATCCCGACGCTATGAATGAA AGG  
GGTCGGCGGGCATGAAAACGAAAATCTATGCTCTTTTCTCTCCACGCTTCTGTTGCTGGATCAATCGCTTATGATATGTACAAAA  
TTCCCATACATCCTGGATGGTTTATCAAAGGGAATATTATAAGTTGCTGGCAAAGAAAACGAACAAGCCTGCATGGCAAAATTTCCGCTCC  
AGATCGTCCAGACCTGGAATGTGATTCTGAATCGTCCGACCGGTGTGACACATGTGATGAGGATCAATATCCGATTTTCAAGGATGCC  
CCCGAGCCATTACCGCACATCCGGACCTTTCGGGATTCATGCAACAAATCCTTTTGGAAAGTTTGGCTGCACTGTCTGTGATGATGAAA  
CGGACTTGCACAACAGTCCAGTCCGCTCACGGGTTCAATGTAACGTTGGACTATCAGCCGAAATTCGGTCCGTTTGTCTGAAGCCAGCTGCA  
CGAAATGTATACCGATCTTTATAACGCGGGCGTGAACCCACCGATGACCCCTTATCTCAATCTGGCAAAGAAGACAATCAATCAGAAAGGT  
TGCGGTTCTTGCCATTCTATGGTGCAGTTTAACTGACGCGGGTTTGGCACCGGATCTTCCGGCTTCGGTTCCCGAACAGAACTGGGCTT  
CTATAACGTTACCTTTTGAAGTATGTCAATGGGATTCAATCGGAGCGTGAATGGGAGTGGGAACACTTCAAAAACCCGAGACGAATTTCTC  
CCGGTGTTCGCGCTTTAAGGTGCTCCGACAAATCATGCCGAATTCATCTGACCGACGAGCAGACGACGCTTTAACAACCTTGGGTGCTG  
GGACTTGTGATCCGGCGGTGATCACCATTCCCCAGACTTATCTCCCGTTGAGCGCTCACAGGGACGTCCTGTTCTTATTCGGTCAAAA  
AGGCAATATTGGGGCAATTCGGATTGAGCATACAAGAAAGTTGCCTTCAAGCAGTAAATTTGATCTCTCTCTCTC AAAAGGAGCGCTTCG  
GGCTCCTTTTTTTTT

1. *pnrA* product: Pyridine nucleotide-disulphide oxidoreductase(EAY56756.1)

MKGKYKLHIPEYQYYADQVACRKGCPVGTDAAGGYVQAIRSGLYEKAYAIARGPNPFASVCGWVCNAPCEASCTRGNIDSPVTIRALKRFVTE  
KFGVEAVMDPASTLRYSTAPGVVYGRATGEKVAIIGGGPAGLTAHDLARLGYRITMFEANKRLGGLFYLVPYRLRPLRIQAEVDIAISM  
FDIRLGTQVKGKDVFSKEIQEEFKSVVAVGAWGSRPVPFEGKELEHVYSALPFLQSVYLDHSPVPVGRRAVAVGAGNVAMDVCRATAVRLPGV

EKVSVIALEDWNEPADDMEIEDAVAEGVEFLVRKGTRRVVGEKGVQGLEVVRLSVFDDQGRFSPTYDETEKSVVPFDSVVFAIGQTIDSS  
FIPSEHDSVIGRNGVIRANIHSMETGIPGVFAAGDVVTGPRIFIDAIAGGQKAAASVHRYLTGKSEEVKVYAVSTPVDHRGNPTPIWPVDFN  
VDGYYGISRANPSLLTPEFRKTNFELAELSFSEEEAREQASRCLTCHVNPIFEGEKCMCGGCVDVCPEYALKMIPLSDVDLDQESTAKVVE  
SFLGVELSKREEVGVDQNLHDSTAMIWEGSRCIRCGLCAKRCPTGAISMEFLEIKQEVALP

2. *petA* product: Putative Rieske iron-sulfur family protein (EAY56757.1)

MSTAMSGTGNQDSLKDAASPSDLGRRKFMLAAGWGVVGTLAGSTYAAVKFMFPPILYEPPTVFKIGHVTEYGLGVDERWKLKGRFVVRNM  
RGIYNMISICRHLGCTPNWFPDQKRFRCPCHGSIYDVHGNVRGGPAPRTLWRGQITKDPVDGALVVNTVVRLLDPNPAQTPQGLWVKEKVKEV  
KPFWIEHSPPPGASCSSNRLLC

3. *petB* product: Putative cytochrome b/b<sub>6</sub> (EAY56758.1)

MLESLKEKLTQSQVRSIFRHGFPDNDMNRAYVVFVSNVFLHVHPVKVRSALRMRYTFCLGGITLFLFIMLAVTGIWLMFYYPYTGGLAYNN  
IQDLQFVIFGGNLMRDLHRFAAHGMVLFVWLHMTRVFLTGAYKAPREFNWVGVLLLVMTLILSWTGYLLPWLQLAYWAVTVGTMASYPF  
IQNGPWGAQLGFLPTNDIMFMLIGGTIVGQNALIRFYVLHCVLPLFVTIALAVHFWIRKDGFSGPL

4. *petD* product: Putative Subunit IV of b<sub>6</sub>f complex (EAY56759.1)

MENKVTREIFPRDARKSYGLVELMKGSTPIVKKEPEDTVYTWPNLIMIELICALLITAGLIILVQFVHAPLRSLADPSTTPNPMRAPWYFLG  
LQELLVYFDPWYAGVVLPGMIIVGLMTFPYVDTNPKGVGYTFSERKFAIFNYSFGFALWWVTIVIGTYLRGLDWQWYWPWSDHLVHMNPAL  
VTLVPLHIVFVNLHVSVDVKGALCDVLFAYFAVGMAIPYFFMRKFYDSLGGARYFVFMFLFLLSMMGVALKIVLRLLFNKYIVVTPWINV

5. *petG* product: Putative PetG (EAY56760.1)

MSSFHNLNLPWVEQYFGFPYRIGISLTLVVGTAFYYLLIWFQKWQERSFYPEGHPLRKDPDAMNERGRRRA

6. *cycC3* product: Probable cytochromec<sub>3</sub> (EAY56761.1)

MKTKIYVLFLLSTLLVAGSIAYDMYKNSHTSWMVYQREYYKLLAKKTNKPALANSPLQIVQTNVILNRADRCQTCHMGINIPIFKDAPEPF  
TAHPDLSGFMHKKHPFGKFGCTVCHDGNGLATTVQSAHGPNVTLDYQPKFGPFAEASCTKCHTDLYNAGVNPMPPTYNLAKKTINQKCGSC  
HSMVQFNLHGVLAPDLSGFGSRTELGFYNVHLFEYVNGIHSEREWEEHFKNPRRISPGVPAFKVPPTIMPNFHLTDEQTTALTWVLGLVD  
PAVITIPQTYLPEVSQGRPVPIPVTKGNIGAIIPDSAYKKVAFKQPETI

**Notes:** Gene sequences are indicated in red. Start and stop codons are underlining. Grey box indicates sequence of Rho-independent terminator predicted by using the mfold RNA secondary structure program ([bioinfo-.math.rpi.edu/\\_mfold/rna/](http://bioinfo-.math.rpi.edu/_mfold/rna/).)
